# Supplementary material
Source: publisher figshare collection journal article supplement (https://geolsoc.figshare.com/ndownloader/files/16214495)
Supplement: Supplementary file 1 [file 16214495]

					RATIOS							AGES [Ma]						Conc.
Sample	Analysis	U [ppm]a	Pb [ppm]a	Th/Ua	207Pb/235Ub	2 sd	206Pb/238Ub	2 sd	rhoc	207Pb/206Pbe	2 sd	207Pb/235U	2 s	206Pb/238U	2 s	207Pb/206Pb	2 s	%
18/25-1 3544.1m	Zircon_Sample_007	316.4803	103.9009	0.3569	4.9854	0.2275	0.3283	0.0129	0.8629	0.1101	0.0025	1816.8494	38.6183	1830.1428	62.7529	1801.6396	41.9497	101.5821
18/25-1 3544.1m	Zircon_Sample_008	98.4868	3.9937	0.4953	0.2869	0.0205	0.0406	0.0013	0.4615	0.0513	0.0033	256.1256	16.2118	256.2437	8.3016	255.0445	146.0604	100.4702
18/25-1 3544.1m	Zircon_Sample_009	9069.4641	181.6506	0.0487	0.2315	0.0124	0.02	0.0008	0.7577	0.0838	0.0029	211.4436	10.1883	127.838	5.1191	1288.6638	67.7989	9.9202
18/25-1 3544.1m	Zircon_Sample_010	3123.9141	52.1639	0.0874	0.2421	0.0094	0.0167	0.0006	0.9679	0.1052	0.001	220.1541	7.715	106.7549	3.9945	1717.141	18.0038	6.217
18/25-1 3544.1m	Zircon_Sample_011	344.739	108.0034	0.4148	4.6035	0.1413	0.3133	0.0084	0.8774	0.1066	0.0016	1749.9018	25.6187	1756.8772	41.4291	1741.5795	26.9969	100.8784
18/25-1 3544.1m	Zircon_Sample_012	120.5068	42.1543	1.0606	7.8607	0.3114	0.3498	0.0123	0.8839	0.163	0.003	2215.1889	35.7035	1933.6849	58.5051	2486.7994	31.2326	77.758
18/25-1 3544.1m	Zircon_Sample_013	1059.1395	156.8367	0.3394	3.2941	0.1325	0.1481	0.004	0.6664	0.1613	0.0048	1479.6482	31.3486	890.188	22.2915	2469.7248	50.6508	36.044
18/25-1 3544.1m	Zircon_Sample_014	85.9986	38.0007	0.7827	11.9831	0.4155	0.4419	0.0121	0.789	0.1967	0.0042	2603.0834	32.5087	2359.0303	54.0539	2798.8694	34.8548	84.2851
18/25-1 3544.1m	Zircon_Sample_015	106.7593	43.0962	0.7817	9.8034	0.2739	0.4037	0.0091	0.8078	0.1761	0.0029	2416.4668	25.7451	2185.9463	41.8385	2616.7891	27.4003	83.5354
18/25-1 3544.1m	Zircon_Sample_016	114.165	30.4428	0.7926	3.7694	0.1358	0.2667	0.0077	0.7972	0.1025	0.0022	1586.2567	28.9231	1523.8074	38.9846	1670.2944	40.2203	91.2299
18/25-1 3544.1m	Zircon_Sample_020	156.5557	47.9749	0.2916	4.4969	0.1529	0.3064	0.0099	0.9453	0.1064	0.0012	1730.3948	28.2513	1723.1643	48.6041	1739.1492	20.3238	99.0809
18/25-1 3544.1m	Zircon_Sample_021	25.4153	7.849	0.5481	4.5929	0.1988	0.3088	0.0084	0.629	0.1079	0.0036	1747.9871	36.1133	1734.9367	41.4226	1763.6306	61.5028	98.373
18/25-1 3544.1m	Zircon_Sample_022	320.0541	70.7073	0.8328	3.3398	0.1407	0.2209	0.0088	0.9404	0.1096	0.0016	1490.4196	32.9212	1286.7504	46.2004	1793.5018	26.0718	71.7451
18/25-1 3544.1m	Zircon_Sample_023	185.9008	50.7927	0.7095	4.1608	0.3394	0.2732	0.0217	0.9722	0.1104	0.0021	1666.3415	66.8811	1557.1491	109.7271	1806.7966	34.7273	86.1829
18/25-1 3544.1m	Zircon_Sample_024	576.4046	119.2151	0.5043	3.1409	0.0601	0.2068	0.0014	0.3435	0.1101	0.002	1442.7706	14.7436	1211.8823	7.2646	1801.7319	32.6989	67.2621
18/25-1 3544.1m	Zircon_Sample_025	67.7421	22.0098	0.5195	4.9425	0.1921	0.3249	0.01	0.788	0.1103	0.0026	1809.541	32.8328	1813.6395	48.4133	1804.8237	43.508	100.4885
18/25-1 3544.1m	Zircon_Sample_026	262.5334	104.1166	0.8481	9.8742	0.2973	0.3966	0.0104	0.8711	0.1806	0.0027	2423.1075	27.764	2153.2919	48.0057	2658.1955	24.509	81.0058
18/25-1 3544.1m	Zircon_Sample_027	44.5496	21.817	0.5771	13.3833	0.3822	0.4897	0.0097	0.6914	0.1982	0.0041	2707.0832	26.9902	2569.4751	41.8452	2811.4679	33.7233	91.3927
18/25-1 3544.1m	Zircon_Sample_028	159.8304	9.6325	0.5095	0.4539	0.0215	0.0603	0.0014	0.5052	0.0546	0.0022	380.0359	14.9959	377.2482	8.7552	397.0558	91.5111	95.0114
18/25-1 3544.1m	Zircon_Sample_029	202.3845	46.5752	1.2908	3.487	0.0893	0.2301	0.0027	0.4652	0.1099	0.0025	1524.2777	20.2001	1335.192	14.3588	1797.6467	41.2345	74.2744
18/25-1 3544.1m	Zircon_Sample_033	215.5381	70.6858	0.3672	4.9961	0.1803	0.328	0.0097	0.8221	0.1105	0.0023	1818.6694	30.5412	1828.4389	47.2342	1807.4971	37.3431	101.1586
18/25-1 3544.1m	Zircon_Sample_034	208.1603	67.019	0.7321	4.8722	0.2575	0.322	0.015	0.8805	0.1098	0.0028	1797.4653	44.5491	1799.2877	73.0518	1795.3518	45.6105	100.2192
18/25-1 3544.1m	Zircon_Sample_035	77.2863	24.0715	0.2794	4.5528	0.1862	0.3115	0.0089	0.6946	0.106	0.0031	1740.6807	34.0696	1747.8824	43.5024	1732.0392	53.9942	100.9147
18/25-1 3544.1m	Zircon_Sample_036	209.3069	55.4821	0.5779	4.0427	0.1833	0.2651	0.011	0.9162	0.1106	0.002	1642.8357	36.9213	1515.7572	56.1048	1809.4959	33.0214	83.7668
18/25-1 3544.1m	Zircon_Sample_037	187.5481	59.5578	0.1558	4.816	0.2025	0.3176	0.0109	0.818	0.11	0.0027	1787.6984	35.3611	1777.803	53.4294	1799.2667	44.0018	98.8071
18/25-1 3544.1m	Zircon_Sample_038	378.9854	119.1093	0.2875	4.8023	0.1636	0.3143	0.0065	0.6107	0.1108	0.003	1785.3082	28.6418	1761.7564	32.0782	1812.9471	49.0075	97.1764
18/25-1 3544.1m	Zircon_Sample_039	972.5299	189.43	0.2399	2.7652	0.076	0.1948	0.0044	0.8295	0.103	0.0016	1346.1909	20.494	1147.2204	23.956	1678.1895	28.3469	68.3606
18/25-1 3544.1m	Zircon_Sample_040	16.5326	5.0142	0.5558	4.591	0.3245	0.3033	0.0103	0.4818	0.1098	0.0068	1747.6379	59.0021	1707.6127	51.0959	1795.8573	112.7439	95.0862
18/25-1 3544.1m	Zircon_Sample_041	133.6772	65.5503	0.3822	12.3684	0.4433	0.4904	0.0138	0.7852	0.1829	0.0041	2632.7767	33.6822	2572.2451	59.6922	2679.6461	36.7142	95.992
18/25-1 3544.1m	Zircon_Sample_042	748.9466	134.5724	0.6858	2.7191	0.0941	0.1797	0.0048	0.777	0.1098	0.0024	1333.6865	25.6871	1065.2382	26.3938	1795.3206	39.6405	59.3341
18/25-1 3544.1m	Zircon_Sample_046	733.6918	125.3408	0.6281	2.567	0.0755	0.1708	0.0046	0.9209	0.109	0.0013	1291.2865	21.5079	1016.7147	25.4921	1782.4266	20.9129	57.041
18/25-1 3544.1m	Zircon_Sample_047	168.4852	52.9098	0.3084	4.6947	0.2105	0.314	0.0085	0.6	0.1084	0.0039	1766.2995	37.5571	1760.5179	41.4548	1773.1429	65.4882	99.288
18/25-1 3544.1m	Zircon_Sample_048	146.8285	44.1651	2.1097	4.556	0.1534	0.3008	0.0075	0.7395	0.1099	0.0025	1741.256	28.0437	1695.2434	37.119	1796.9711	41.2532	94.3389
18/25-1 3544.1m	Zircon_Sample_049	159.5831	40.715	0.4263	3.3052	0.1126	0.2551	0.0071	0.8137	0.094	0.0019	1482.2839	26.5536	1464.8966	36.3122	1507.2572	37.3924	97.1896
18/25-1 3544.1m	Zircon_Sample_050	240.4526	126.3287	1.2867	13.3655	0.3448	0.5254	0.0108	0.7946	0.1845	0.0029	2705.8235	24.3767	2721.9506	45.5159	2693.8019	25.8767	101.0449
18/25-1 3544.1m	Zircon_Sample_051	282.3181	92.3175	0.5246	4.984	0.1438	0.327	0.0074	0.7865	0.1105	0.002	1816.6185	24.4055	1823.8154	36.0459	1808.3744	32.3887	100.8539
18/25-1 3544.1m	Zircon_Sample_052	188.7922	51.9646	0.4773	4.0344	0.1335	0.2752	0.0063	0.6886	0.1063	0.0026	1641.1502	26.9237	1567.3836	31.6953	1736.9798	43.9839	90.2361
18/25-1 3544.1m	Zircon_Sample_053	380.962	16.0699	0.8991	0.3057	0.0153	0.0422	0.0011	0.5356	0.0526	0.0022	270.8478	11.8907	266.346	6.9896	309.9425	96.1533	85.934
18/25-1 3544.1m	Zircon_Sample_054	216.1844	68.359	0.2864	4.7426	0.1779	0.3162	0.0071	0.5984	0.1088	0.0033	1774.796	31.4741	1771.1781	34.7742	1779.0544	54.8323	99.5573
18/25-1 3544.1m	Zircon_Sample_055	105.213	32.3288	0.3338	4.6782	0.149	0.3073	0.0073	0.749	0.1104	0.0023	1763.3572	26.6491	1727.2586	36.1461	1806.3918	38.3586	95.6193
18/25-1 3544.1m	Zircon_Sample_059	341.778	14.7538	0.871	0.3065	0.015	0.0432	0.0014	0.6734	0.0515	0.0019	271.4868	11.638	272.438	8.7751	263.2926	82.9129	103.4735
18/25-1 3544.1m	Zircon_Sample_060	1177.0179	201.243	0.6307	2.4052	0.1803	0.171	0.0113	0.8787	0.102	0.0037	1244.1388	53.8016	1017.492	61.99	1661.2732	66.2295	61.2477
18/25-1 3544.1m	Zircon_Sample_061	91.4954	46.8266	0.9806	12.9955	0.4884	0.5118	0.0165	0.8593	0.1842	0.0035	2679.3297	35.4513	2664.2738	70.4882	2690.7106	31.7653	99.0175
18/25-1 3544.1m	Zircon_Sample_062	57.7249	11.0725	0.4413	2.05	0.1044	0.1918	0.0047	0.4812	0.0775	0.0035	1132.3094	34.7654	1131.2031	25.422	1134.4312	88.8431	99.7154
18/25-1 3544.1m	Zircon_Sample_063	198.2328	64.3934	0.4401	4.9388	0.165	0.3248	0.0078	0.7216	0.1103	0.0026	1808.9084	28.2135	1813.308	38.0998	1803.8429	42.0525	100.5247
18/25-1 3544.1m	Zircon_Sample_064	545.9771	102.9808	0.7863	2.8369	0.1445	0.1886	0.0079	0.8263	0.1091	0.0031	1365.3501	38.2647	1113.881	43.0629	1784.1743	52.3045	62.4312
18/25-1 3544.1m	Zircon_Sample_066	203.8261	64.9401	0.4446	4.8239	0.1243	0.3186	0.0065	0.7915	0.1098	0.0017	1789.068	21.6821	1782.9157	31.7775	1796.2497	28.6758	99.2577
18/25-1 3544.1m	Zircon_Sample_067	170.1661	8.1503	0.8723	0.3713	0.0262	0.0479	0.0011	0.3142	0.0562	0.0038	320.598	19.3691	301.5908	6.5209	461.0929	148.2651	65.4078
18/25-1 3544.1m	Zircon_Sample_068	259.8305	10.2348	0.9572	0.2801	0.0166	0.0394	0.001	0.4369	0.0516	0.0028	250.772	13.1707	249.0516	6.3262	266.8971	122.3144	93.3137
18/25-1 3544.1m	Zircon_Sample_072	224.1369	51.6935	0.2139	2.86	0.1287	0.2306	0.009	0.8708	0.0899	0.002	1371.4348	33.8752	1337.8185	47.355	1424.1846	42.2655	93.9358
18/25-1 3544.1m	Zircon_Sample_073	310.882	88.7252	0.5975	4.3502	0.2779	0.2854	0.0171	0.9363	0.1106	0.0025	1702.9422	52.7866	1618.4931	85.613	1808.4818	40.7707	89.4946
18/25-1 3544.1m	Zircon_Sample_074	215.0762	70.7345	0.4383	5.0099	0.2369	0.3289	0.0136	0.8718	0.1105	0.0026	1820.9935	40.0533	1832.9571	65.782	1807.3359	42.1183	101.4176
18/25-1 3544.1m	Zircon_Sample_075	473.0832	103.6369	0.2032	3.2863	0.091	0.2191	0.0022	0.3595	0.1088	0.0028	1477.821	21.5502	1276.9427	11.5278	1779.4411	47.1067	71.7609
18/25-1 3544.1m	Zircon_Sample_076	281.2387	82.0909	1.0265	7.4028	0.1034	0.2919	0.0038	0.9244	0.1839	0.001	2161.3079	12.4988	1650.9685	18.812	2688.7135	8.8061	61.4037
18/25-1 3544.1m	Zircon_Sample_077	1050.3103	216.9348	0.9531	2.9597	0.1316	0.2065	0.0062	0.6773	0.1039	0.0034	1397.3495	33.7593	1210.3767	33.233	1695.4599	60.2991	71.3893
18/25-1 3544.1m	Zircon_Sample_078	132.2082	43.201	0.3618	5.0194	0.206	0.3268	0.0109	0.8119	0.1114	0.0027	1822.597	34.7699	1822.6835	52.9129	1822.498	43.4821	100.0102
18/25-1 3544.1m	Zircon_Sample_079	1341.1354	327.8365	0.1619	3.8883	0.1285	0.2444	0.004	0.4963	0.1154	0.0033	1611.2477	26.6997	1409.7744	20.7724	1885.5742	51.6602	74.7663
18/25-1 3544.1m	Zircon_Sample_080	1342.8352	191.3711	0.5144	2.1242	0.1087	0.1425	0.0063	0.8655	0.1081	0.0028	1156.6983	35.3316	858.8556	35.6034	1767.6909	46.8041	48.5863
18/25-1 3544.1m	Zircon_Sample_081	310.915	81.8128	0.2456	3.9849	0.0583	0.2631	0.0036	0.9276	0.1098	0.0006	1631.1239	11.8721	1505.8637	18.2195	1796.652	9.9427	83.815
18/25-1 3544.1m	Zircon_Sample_085	124.6859	33.9	0.6677	4.1404	0.1186	0.2719	0.0068	0.877	0.1104	0.0015	1662.3121	23.4305	1550.3528	34.6175	1806.7928	25.0169	85.8069
18/25-1 3544.1m	Zircon_Sample_086	117.7431	30.5125	0.483	3.9476	0.1463	0.2591	0.0057	0.5884	0.1105	0.0033	1623.4981	30.0276	1485.4664	28.9264	1807.342	54.4574	82.1907
18/25-1 3544.1m	Zircon_Sample_087	784.6086	104.235	0.7067	1.9518	0.1108	0.1328	0.0066	0.8749	0.1066	0.0029	1099.062	38.1413	804.1017	37.5573	1741.2894	50.3925	46.1785
18/25-1 3544.1m	Zircon_Sample_088	2539.7004	95.9142	0.3825	0.5028	0.0374	0.0378	0.0017	0.6057	0.0966	0.0057	413.5966	25.2527	238.9704	10.5601	1558.6785	110.9388	15.3316
18/25-1 3544.1m	Zircon_Sample_089	364.2004	80.991	1.0822	5.9488	0.1526	0.2224	0.0043	0.7573	0.194	0.0033	1968.396	22.3011	1294.4409	22.7823	2776.4956	27.4631	46.6214
18/25-1 3544.1m	Zircon_Sample_090	303.2678	78.5255	0.5826	3.954	0.1613	0.2589	0.0012	0.1136	0.1108	0.0045	1624.8037	33.0812	1484.3712	6.1447	1811.7705	73.6515	81.9293
18/25-1 3544.1m	Zircon_Sample_091	310.7123	124.1481	0.5212	9.9536	0.1503	0.3996	0.0043	0.7142	0.1807	0.0019	2430.4936	13.9365	2167.0118	19.8521	2659.0791	17.5218	81.4948
18/25-1 3544.1m	Zircon_Sample_092	174.6466	54.9454	0.2309	4.5893	0.1298	0.3146	0.0033	0.3707	0.1058	0.0028	1747.3221	23.5926	1763.3482	16.1822	1728.2008	48.2341	102.0338
18/25-1 3544.1m	Zircon_Sample_093	126.5314	54.7492	1.1708	11.069	0.3941	0.4327	0.0126	0.8147	0.1855	0.0038	2528.9556	33.1647	2317.8457	56.4703	2702.9892	34.0738	85.7512
18/25-1 3544.1m	Zircon_Sample_094	406.6129	171.2388	0.3282	11.2966	0.449	0.4211	0.0143	0.8566	0.1945	0.004	2547.9238	37.0959	2265.6281	65.0499	2780.9912	33.61	81.4684
18/25-1 3544.1m	Zircon_Sample_098	436.206	19.737	1.1938	0.3318	0.0102	0.0452	0.0008	0.5412	0.0532	0.0014	290.967	7.7491	285.2749	4.6255	336.9244	58.356	84.6703
18/25-1 3544.1m	Zircon_Sample_099	205.6504	67.6182	0.4955	4.9976	0.1575	0.3288	0.0077	0.7392	0.1102	0.0023	1818.9156	26.6722	1832.5701	37.1614	1803.3128	38.6031	101.6224
18/25-1 3544.1m	Zircon_Sample_100	1554.0105	166.856	0.4329	1.4924	0.0558	0.1074	0.0031	0.782	0.1008	0.0024	927.2904	22.7419	657.4631	18.2791	1639.0291	43.2789	40.113
18/25-1 3544.1m	Zircon_Sample_101	916.8876	99.0707	0.5262	2.8274	0.112	0.1081	0.0022	0.5162	0.1898	0.0064	1362.8384	29.7277	661.4195	12.8573	2740.2929	55.8174	24.1368
18/25-1 3544.1m	Zircon_Sample_102	164.0706	51.6786	0.3983	4.652	0.1315	0.315	0.0082	0.9196	0.1071	0.0012	1758.6565	23.6352	1765.1557	40.1503	1750.9437	20.3345	100.8117
18/25-1 3544.1m	Zircon_Sample_103	117.4208	5.324	0.9475	0.3236	0.0222	0.0453	0.002	0.6449	0.0518	0.0027	284.6923	17.0686	285.8535	12.3953	275.1677	120.365	103.8834
18/25-1 3544.1m	Zircon_Sample_104	122.7138	38.0732	0.3109	4.6129	0.1797	0.3103	0.0069	0.5741	0.1078	0.0034	1751.5978	32.5244	1741.9858	34.1448	1763.0868	58.3049	98.8032
18/25-1 3544.1m	Zircon_Sample_105	622.6225	123.0988	0.5819	2.9186	0.0799	0.1977	0.0028	0.5226	0.1071	0.0025	1386.756	20.7157	1163.0073	15.2319	1750.0637	42.7447	66.4551
18/25-1 3544.1m	Zircon_Sample_106	40.9992	20.9057	2.2173	13.1591	0.4042	0.5099	0.0102	0.6538	0.1872	0.0044	2691.1298	28.9931	2656.224	43.7195	2717.4534	38.3104	97.7468
18/25-1 3544.1m	Zircon_Sample_107	294.5928	87.4713	0.3685	4.3491	0.1462	0.2969	0.0085	0.8536	0.1062	0.0019	1702.7319	27.7576	1676.0313	42.3497	1735.7488	32.1089	96.5596
18/25-1 3544.1m	Zircon_Sample_111	123.903	39.8026	0.4172	4.8912	0.1632	0.3212	0.007	0.6531	0.1104	0.0028	1800.7462	28.1338	1795.7835	34.1538	1806.4972	45.9283	99.4069
18/25-1 3544.1m	Zircon_Sample_112	108.4472	7.6313	0.4092	0.5486	0.0347	0.0704	0.0033	0.7448	0.0565	0.0024	444.0502	22.7891	438.3769	19.9951	473.5545	93.5127	92.5716
18/25-1 3544.1m	Zircon_Sample_113	51.2204	15.6687	0.3853	4.5516	0.2081	0.3059	0.0091	0.6499	0.1079	0.0038	1740.448	38.0813	1720.5394	44.8721	1764.4544	63.5008	97.5111
18/25-1 3544.1m	Zircon_Sample_114	900.0193	171.8064	0.4916	3.6142	0.2238	0.1909	0.0079	0.6691	0.1373	0.0063	1552.6579	49.2934	1126.2046	42.8182	2193.6275	79.994	51.3398
18/25-1 3544.1m	Zircon_Sample_115	297.1367	49.9547	0.8049	2.489	0.152	0.1681	0.0071	0.6895	0.1074	0.0048	1268.8495	44.2697	1001.7454	39.0723	1755.3696	80.9263	57.0675
18/25-1 3544.1m	Zircon_Sample_116	123.0363	5.1179	0.467	0.2946	0.0172	0.0416	0.0018	0.7294	0.0514	0.0021	262.1633	13.4805	262.7243	10.9545	257.1516	91.7287	102.1671
18/25-1 3544.1m	Zircon_Sample_117	568.5364	145.9714	0.9789	3.7557	0.082	0.2567	0.003	0.539	0.1061	0.002	1583.3356	17.5001	1473.1893	15.4909	1733.3168	33.7175	84.9925
18/25-1 3544.1m	Zircon_Sample_118	2017.26	206.1159	0.5411	1.4071	0.0534	0.1022	0.0036	0.9174	0.0999	0.0015	891.9277	22.5471	627.1495	20.8218	1621.8059	28.1303	38.6698
18/25-1 3544.1m	Zircon_Sample_119	2671.596	77.4387	0.1432	0.43	0.0198	0.029	0.0006	0.4802	0.1076	0.0043	363.186	14.0413	184.1985	4.0095	1759.0856	73.7569	10.4713
18/25-1 3544.1m	Zircon_Sample_120	165.1745	51.2849	0.5804	7.3661	0.248	0.3105	0.0068	0.6524	0.1721	0.0044	2156.8635	30.1071	1743.1134	33.5485	2577.8198	42.6195	67.6197
18/25-1 3544.1m	Zircon_Sample_124	158.48	6.615	0.8762	0.2955	0.0206	0.0417	0.0015	0.5013	0.0514	0.0031	262.9087	16.162	263.6122	9.0347	256.6435	138.7551	102.7153
18/25-1 3544.1m	Zircon_Sample_125	395.2249	123.2904	0.4348	4.6701	0.1858	0.312	0.0102	0.8236	0.1086	0.0025	1761.8939	33.2806	1750.2955	50.2181	1775.6738	41.1757	98.5708
18/25-1 3544.1m	Zircon_Sample_126	118.1027	33.7614	0.2095	4.2068	0.1609	0.2859	0.0056	0.5149	0.1067	0.0035	1675.3467	31.3912	1620.83	28.225	1744.3236	60.0735	92.9203
18/25-1 3544.1m	Zircon_Sample_127	258.7343	10.8231	0.775	0.2958	0.0175	0.0418	0.0012	0.4944	0.0513	0.0026	263.148	13.6751	264.1731	7.5489	254.0307	117.9076	103.9926
18/25-1 3544.1m	Zircon_Sample_128	77.4096	31.7735	0.3415	8.2995	0.3792	0.4105	0.0096	0.5108	0.1466	0.0058	2264.2642	41.4259	2217.0233	43.7854	2307.2174	67.4368	96.0908
18/25-1 3544.1m	Zircon_Sample_130	2010.4151	601.8007	0.3449	7.0177	0.2548	0.2993	0.0007	0.0672	0.17	0.0062	2113.6714	32.2818	1688.0426	3.6217	2557.9377	60.636	65.9923
18/25-1 3544.1m	Zircon_Sample_131	142.3814	43.4014	0.5626	4.6223	0.1653	0.3048	0.0097	0.8879	0.11	0.0018	1753.3105	29.8666	1715.1892	47.8244	1799.058	29.9452	95.3382
18/25-1 3544.1m	Zircon_Sample_132	169.2139	97.4492	0.2062	16.7012	0.5685	0.5759	0.0146	0.7458	0.2103	0.0048	2917.8374	32.6233	2931.9725	59.8069	2908.101	36.7453	100.8209
18/25-1 3544.1m	Zircon_Sample_133	358.3683	14.806	1.1995	0.2943	0.0204	0.0413	0.0014	0.5022	0.0517	0.0031	261.9195	16.0226	260.9796	8.9145	270.3365	137.5898	96.5388
18/25-1 3544.1m	Zircon_Sample_137	197.1337	105.1179	0.5663	14.0543	0.3826	0.5332	0.0119	0.8184	0.1912	0.003	2753.3763	25.81	2755.053	49.95	2752.1471	25.7009	100.1056
18/25-1 3544.1m	Zircon_Sample_139	211.5114	68.9311	0.7956	5.1805	0.2136	0.3259	0.011	0.8216	0.1153	0.0027	1849.4198	35.1065	1818.4682	53.6769	1884.4137	42.3289	96.5005
18/25-1 3544.1m	Zircon_Sample_140	98.5931	31.5434	0.4815	4.8727	0.1463	0.3199	0.0078	0.8067	0.1105	0.002	1797.5555	25.3026	1789.4145	37.8505	1807.0131	32.2538	99.0261
18/25-1 3544.1m	Zircon_Sample_141	1188.5803	339.3368	0.1715	5.3616	0.3272	0.2855	0.0107	0.6125	0.1362	0.0066	1878.7492	52.2656	1618.9902	53.5083	2179.4988	83.9666	74.2827
18/25-1 3544.1m	Zircon_Sample_142	185.5371	58.3537	0.543	5.0683	0.4858	0.3145	0.0086	0.2846	0.1169	0.0107	1830.815	81.4663	1762.8745	42.0772	1908.9784	164.9926	92.3465
18/25-1 3544.1m	Zircon_Sample_143	2860.4253	112.6176	0.3357	0.5598	0.0364	0.0394	0.0016	0.6398	0.1031	0.0052	451.3733	23.73	248.9326	10.1717	1680.9615	92.4046	14.8089
18/25-1 3544.1m	Zircon_Sample_144	349.1765	93.9324	0.4725	3.9358	0.1542	0.269	0.0095	0.9014	0.1061	0.0018	1621.0781	31.7309	1535.7814	48.2597	1733.6582	31.1167	88.5862
18/25-1 3544.1m	Zircon_Sample_145	108.676	33.2614	0.2708	4.6741	0.145	0.3061	0.0062	0.6507	0.1108	0.0026	1762.6151	25.9619	1721.288	30.5033	1811.9511	42.8078	94.9964
18/25-1 3544.1m	Zircon_Sample_146	229.2585	123.1326	0.6092	13.8356	0.6873	0.5371	0.0258	0.9651	0.1868	0.0024	2738.5166	47.0743	2771.2596	108.0032	2714.461	21.4458	102.0924
18/25-1 3544.1m	Zircon_Sample_150	90.1081	28.7526	0.3253	4.8137	0.2034	0.3191	0.0106	0.7823	0.1094	0.0029	1787.2893	35.5449	1785.2826	51.5591	1789.6326	47.9506	99.7569
18/25-1 3544.1m	Zircon_Sample_151	141.5046	28.221	0.2284	2.1997	0.0758	0.1994	0.0031	0.4523	0.08	0.0025	1180.9368	24.0733	1172.2869	16.7149	1196.8177	60.6524	97.9503
18/25-1 3544.1m	Zircon_Sample_152	629.0267	205.3503	0.2553	6.2636	0.3654	0.3265	0.0136	0.712	0.1392	0.0057	2013.3788	51.1223	1821.1868	65.9022	2216.7106	71.0144	82.1572
18/25-1 3544.1m	Zircon_Sample_153	248.9204	79.6604	0.305	4.8452	0.2055	0.32	0.0118	0.8658	0.1098	0.0023	1792.7827	35.7071	1789.8452	57.3833	1796.202	38.6224	99.6461
18/25-1 3544.1m	Zircon_Sample_154	266.607	55.5069	0.5239	3.075	0.1957	0.2082	0.0089	0.6702	0.1071	0.0051	1426.4772	48.802	1219.2073	47.3807	1750.9667	86.4629	69.6305
18/25-1 3654m	Zircon_Sample_007	201.3079	64.3306	0.5123	4.8397	0.1216	0.3196	0.0066	0.8198	0.1098	0.0016	1791.8332	21.1396	1787.5967	32.1453	1796.7687	26.1803	99.4895
18/25-1 3654m	Zircon_Sample_008	193.62	77.5023	1.0304	10.2515	0.2077	0.4003	0.0066	0.8151	0.1857	0.0022	2457.7385	18.7447	2170.3303	30.4304	2704.8695	19.369	80.2379
18/25-1 3654m	Zircon_Sample_009	195.3641	65.911	0.4935	5.1318	0.2444	0.3374	0.0147	0.9167	0.1103	0.0021	1841.3778	40.4968	1874.0302	71.0044	1804.6742	34.6121	103.8431
18/25-1 3654m	Zircon_Sample_011	556.9006	101.922	0.6721	2.7657	0.1875	0.183	0.012	0.9657	0.1096	0.0019	1346.3432	50.5928	1083.4329	65.2828	1792.8149	32.0649	60.4319
18/25-1 3654m	Zircon_Sample_012	61.7081	32.6585	0.2197	14.6149	0.4939	0.5292	0.009	0.5055	0.2003	0.0058	2790.501	32.1267	2738.2529	38.108	2828.4917	47.5802	96.8097
18/25-1 3654m	Zircon_Sample_013	276.9981	13.1238	0.8934	0.3743	0.0147	0.0474	0.0012	0.631	0.0573	0.0017	322.8654	10.8249	298.4072	7.2011	503.2466	66.8285	59.2964
18/25-1 3654m	Zircon_Sample_014	134.9898	73.1126	0.4507	14.6278	0.2309	0.5416	0.0068	0.7988	0.1959	0.0019	2791.3416	15.004	2790.2098	28.5605	2792.1596	15.5456	99.9302
18/25-1 3654m	Zircon_Sample_015	350.8777	23.7724	1.4784	0.5213	0.0215	0.0678	0.002	0.7095	0.0558	0.0016	426.041	14.3335	422.5936	11.954	444.7346	64.5352	95.0215
18/25-1 3654m	Zircon_Sample_016	136.4986	5.7192	0.5692	0.3044	0.015	0.0419	0.0009	0.4448	0.0527	0.0023	269.8661	11.6992	264.5955	5.6922	315.8457	100.5502	83.7737
18/25-1 3654m	Zircon_Sample_020	141.2572	5.9545	0.9712	0.3057	0.0198	0.0422	0.0019	0.6872	0.0526	0.0025	270.8616	15.4306	266.1673	11.6291	311.6341	107.3023	85.4102
18/25-1 3654m	Zircon_Sample_021	195.3207	101.6967	1.9987	13.1363	0.3914	0.5207	0.013	0.8362	0.183	0.003	2689.4923	28.1171	2702.0006	54.9838	2680.1046	27.0296	100.817
18/25-1 3654m	Zircon_Sample_022	429.6501	228.0833	0.5913	13.9382	0.4478	0.5309	0.0154	0.9005	0.1904	0.0027	2745.5183	30.4491	2745.0666	64.6828	2745.8505	22.9655	99.9715
18/25-1 3654m	Zircon_Sample_023	599.194	24.4232	0.7101	0.2932	0.0074	0.0408	0.0008	0.7577	0.0522	0.0009	261.0834	5.8147	257.5429	4.8313	292.9841	37.6407	87.9034
18/25-1 3654m	Zircon_Sample_024	111.8693	20.0401	0.666	1.8453	0.0891	0.1791	0.0052	0.6023	0.0747	0.0029	1061.7564	31.8101	1062.2653	28.4835	1060.7108	77.5711	100.1465
18/25-1 3654m	Zircon_Sample_025	727.6919	125.0087	2.7495	4.3393	0.1478	0.1718	0.0051	0.8715	0.1832	0.0031	1700.8561	28.1172	1021.9547	28.0571	2682.0424	27.625	38.1036
18/25-1 3654m	Zircon_Sample_026	32.9284	9.3447	0.8643	4.3038	0.2259	0.2838	0.0099	0.6613	0.11	0.0043	1694.0942	43.2688	1610.4082	49.4618	1799.2681	71.6268	89.5035
18/25-1 3654m	Zircon_Sample_027	285.186	76.5503	1.0287	3.9825	0.0961	0.2684	0.0043	0.6651	0.1076	0.0019	1630.6273	19.5963	1532.7892	21.9045	1759.2458	32.9661	87.1276
18/25-1 3654m	Zircon_Sample_028	450.7006	209.4637	0.6482	11.1642	0.415	0.4648	0.0119	0.6864	0.1742	0.0047	2536.9329	34.6584	2460.5033	52.1973	2598.6328	45.0683	94.6845
18/25-1 3654m	Zircon_Sample_029	315.5993	98.3389	0.5259	4.6091	0.1306	0.3116	0.0069	0.7805	0.1073	0.0019	1750.9189	23.6418	1748.5462	33.8643	1753.7527	32.4057	99.7031
18/25-1 3654m	Zircon_Sample_033	50.1368	2.1012	1.0467	0.2976	0.0314	0.0419	0.001	0.2305	0.0515	0.0053	264.4883	24.5876	264.6581	6.3109	262.9848	235.8561	100.6363
18/25-1 3654m	Zircon_Sample_034	267.8531	85.4466	0.6454	4.8247	0.1542	0.319	0.008	0.7876	0.1097	0.0022	1789.2149	26.8859	1784.8706	39.2457	1794.2841	35.8507	99.4754
18/25-1 3654m	Zircon_Sample_035	240.9844	77.1743	0.5212	4.8288	0.2175	0.3202	0.0135	0.934	0.1094	0.0018	1789.9314	37.9004	1790.9308	65.7727	1788.7669	29.3202	100.121
18/25-1 3654m	Zircon_Sample_036	186.6771	8.2659	0.573	0.3188	0.021	0.0443	0.0019	0.6581	0.0522	0.0026	280.9501	16.1718	279.3032	11.8523	294.6816	113.241	94.7814
18/25-1 3654m	Zircon_Sample_037	4257.0441	94.2336	0.0664	0.303	0.01	0.0221	0.0006	0.7801	0.0993	0.0021	268.7485	7.7938	141.1409	3.5949	1610.6147	38.4761	8.7632
18/25-1 3654m	Zircon_Sample_038	409.1566	113.725	0.8894	4.2199	0.1728	0.2779	0.009	0.7925	0.1101	0.0028	1677.8936	33.6261	1581.0291	45.5007	1801.2425	45.4301	87.7744
18/25-1 3654m	Zircon_Sample_039	190.4021	7.4146	0.6458	0.2751	0.0112	0.0389	0.001	0.6242	0.0512	0.0016	246.7272	8.9212	246.2712	6.1427	251.0669	73.2092	98.0899
18/25-1 3654m	Zircon_Sample_040	554.4548	169.1818	1.0004	4.6587	0.2593	0.3051	0.0151	0.8884	0.1107	0.0028	1759.8608	46.5676	1716.7059	74.5371	1811.484	46.4307	94.7679
18/25-1 3654m	Zircon_Sample_041	268.8032	85.8743	0.4014	4.7617	0.1518	0.3195	0.009	0.8796	0.1081	0.0016	1778.1707	26.7641	1787.1351	43.7758	1767.6636	27.7112	101.1015
18/25-1 3654m	Zircon_Sample_042	83.7297	44.9861	0.5768	14.648	0.5241	0.5373	0.0169	0.877	0.1977	0.0034	2792.6534	34.0239	2772.0433	70.7035	2807.5742	28.1108	98.7345
18/25-1 3654m	Zircon_Sample_046	130.1163	5.0104	0.7006	0.2727	0.0206	0.0385	0.0014	0.4878	0.0514	0.0034	244.8619	16.4505	243.5745	8.8145	257.222	151.6814	94.6943
18/25-1 3654m	Zircon_Sample_047	198.1056	8.3311	0.9268	0.3027	0.0176	0.0421	0.001	0.409	0.0522	0.0028	268.5044	13.7195	265.5499	6.1863	294.351	121.1358	90.2154
18/25-1 3654m	Zircon_Sample_048	119.3569	36.4115	0.5823	4.652	0.1572	0.3051	0.0073	0.7052	0.1106	0.0027	1758.6444	28.2501	1716.3709	35.9108	1809.2436	43.5431	94.8668
18/25-1 3654m	Zircon_Sample_049	409.0394	41.3001	0.3738	1.014	0.081	0.101	0.0041	0.5022	0.0728	0.005	710.872	40.8498	620.082	23.7138	1009.333	140.053	61.4348
18/25-1 3654m	Zircon_Sample_050	1174.3518	140.5417	0.4567	1.7374	0.0333	0.1197	0.0021	0.9069	0.1053	0.0009	1022.5008	12.3507	728.6982	11.9754	1719.408	14.835	42.3808
18/25-1 3654m	Zircon_Sample_051	107.143	34.0261	0.9992	4.7571	0.2405	0.3176	0.0152	0.9435	0.1086	0.0018	1777.3695	42.446	1777.8842	74.1266	1776.7651	30.5653	100.063
18/25-1 3654m	Zircon_Sample_052	355.649	13.6656	0.9475	0.2737	0.0271	0.0384	0.0036	0.9389	0.0517	0.0018	245.6384	21.5946	243.0586	22.1622	270.3627	78.1142	89.9009
18/25-1 3654m	Zircon_Sample_053	839.5557	113.9572	0.5254	1.8221	0.0836	0.1357	0.0031	0.4994	0.0974	0.0039	1053.4582	30.087	820.5005	17.6524	1574.1961	74.418	52.1219
18/25-1 3654m	Zircon_Sample_054	1096.6995	257.458	0.4068	3.4853	0.1695	0.2348	0.0097	0.8533	0.1077	0.0027	1523.8966	38.382	1359.3831	50.8516	1760.4721	46.3523	77.217
18/25-1 3654m	Zircon_Sample_055	130.3829	42.3408	0.5002	4.9496	0.1242	0.3247	0.0049	0.604	0.1105	0.0022	1810.7566	21.1924	1812.8457	23.9416	1808.3531	36.3351	100.2484
18/25-1 3654m	Zircon_Sample_059	600.2421	134.3473	0.491	3.3344	0.0856	0.2238	0.005	0.8633	0.108	0.0014	1489.139	20.0544	1302.0376	26.1267	1766.7379	23.6706	73.6973
18/25-1 3654m	Zircon_Sample_060	874.5855	282.0459	0.607	4.9197	0.1451	0.3225	0.0071	0.7442	0.1106	0.0022	1805.6408	24.898	1801.8824	34.5114	1809.9825	35.8026	99.5525
18/25-1 3654m	Zircon_Sample_061	257.1956	10.0782	0.5577	0.2764	0.0104	0.0392	0.001	0.6953	0.0512	0.0014	247.8079	8.3126	247.7796	6.3894	248.0766	62.5449	99.8803
18/25-1 3654m	Zircon_Sample_062	263.3954	84.0025	0.2734	4.8228	0.0968	0.3189	0.0057	0.8839	0.1097	0.001	1788.8817	16.888	1784.4604	27.6642	1794.0419	17.0982	99.4659
18/25-1 3654m	Zircon_Sample_063	257.4746	84.2286	0.4395	4.9935	0.1544	0.3271	0.0088	0.8697	0.1107	0.0017	1818.227	26.1715	1824.4739	42.7457	1811.0769	27.7348	100.7397
18/25-1 3654m	Zircon_Sample_064	178.7837	55.8072	0.8404	4.7121	0.1455	0.3121	0.0064	0.6631	0.1095	0.0025	1769.3964	25.8644	1751.2758	31.3935	1790.8501	42.0888	97.7902
18/25-1 3654m	Zircon_Sample_065	458.6347	19.6358	0.5771	0.3072	0.0155	0.0428	0.0009	0.4176	0.052	0.0024	272.006	12.0113	270.2496	5.5636	287.1486	104.5441	94.1149
18/25-1 3654m	Zircon_Sample_066	2145.1666	96.705	0.215	0.3236	0.0084	0.0451	0.0009	0.7633	0.0521	0.0009	284.6538	6.4209	284.2472	5.4898	287.9944	38.1958	98.6989
18/25-1 3654m	Zircon_Sample_067	166.1476	51.7105	0.2625	4.5762	0.1585	0.3112	0.0091	0.8442	0.1066	0.002	1744.9491	28.8694	1746.7686	44.7391	1742.7696	34.0199	100.2295
18/25-1 3654m	Zircon_Sample_068	47.0218	12.7208	0.3228	3.6689	0.1453	0.2705	0.0063	0.5845	0.0984	0.0032	1564.637	31.6012	1543.4893	31.7623	1593.291	59.9978	96.8743
18/25-1 3654m	Zircon_Sample_072	932.8894	127.2071	0.4087	2.0194	0.1663	0.1364	0.0111	0.9867	0.1074	0.0014	1122.0556	55.9837	824.036	62.8574	1755.9088	24.5246	46.9293
18/25-1 3654m	Zircon_Sample_073	402.266	15.8633	0.7015	0.2803	0.0108	0.0394	0.001	0.6693	0.0515	0.0015	250.856	8.5901	249.3284	6.3259	265.1662	65.8976	94.0272
18/25-1 3654m	Zircon_Sample_074	997.8198	129.5283	0.3855	1.8972	0.1562	0.1298	0.0105	0.9808	0.106	0.0017	1080.1074	54.7821	786.7893	59.7979	1731.6941	29.4267	45.4347
18/25-1 3654m	Zircon_Sample_075	464.8883	132.5466	0.541	4.3044	0.1874	0.2851	0.0103	0.8283	0.1095	0.0027	1694.2023	35.8797	1617.0715	51.5678	1791.0102	44.4131	90.2882
18/25-1 3654m	Zircon_Sample_076	923.9123	174.3961	0.2562	4.3668	0.3436	0.1888	0.0044	0.2962	0.1678	0.0126	1706.0758	65.0995	1114.6448	23.8605	2535.6731	126.0623	43.9585
18/25-1 3654m	Zircon_Sample_077	1031.1915	41.9052	0.4108	0.2911	0.0091	0.0406	0.0012	0.9159	0.052	0.0007	259.4565	7.1358	256.784	7.1858	283.669	28.6133	90.5224
18/25-1 3654m	Zircon_Sample_078	232.2276	69.4122	0.6784	4.5516	0.1303	0.2989	0.0062	0.7212	0.1104	0.0022	1740.4541	23.833	1685.8395	30.6219	1806.722	36.0458	93.3093
18/25-1 3654m	Zircon_Sample_079	131.1854	6.1205	0.7131	0.3358	0.0153	0.0467	0.0013	0.5919	0.0522	0.0019	293.9967	11.648	293.9535	7.7604	294.34	83.9647	99.8687
18/25-1 3654m	Zircon_Sample_080	2403.3245	66.8224	0.2029	0.6317	0.0436	0.0278	0.0013	0.6616	0.1648	0.0085	497.1712	27.1449	176.7906	7.9655	2505.3632	87.088	7.0565
18/25-1 3654m	Zircon_Sample_081	108.9973	3.8647	0.5459	0.2691	0.013	0.0355	0.001	0.559	0.055	0.0022	241.9382	10.4263	224.611	5.9766	413.6486	89.7596	54.2999
18/25-1 3654m	Zircon_Sample_086	95.7847	28.0921	0.4003	4.4145	0.2469	0.2933	0.0146	0.8895	0.1092	0.0028	1715.0661	46.3322	1657.9207	72.7274	1785.5657	46.5793	92.8513
18/25-1 3654m	Zircon_Sample_087	112.4448	29.1394	1.3401	3.9369	0.2197	0.2591	0.0137	0.9473	0.1102	0.002	1621.2989	45.2181	1485.4631	70.1424	1802.4094	32.519	82.4154
18/25-1 3654m	Zircon_Sample_088	356.7396	53.7657	1.0001	2.2224	0.1309	0.1507	0.0085	0.9564	0.1069	0.0018	1188.1269	41.2697	904.965	47.5627	1748.0226	31.5032	51.7708
18/25-1 3654m	Zircon_Sample_089	2145.2475	176.8025	0.2758	1.1862	0.0526	0.0824	0.002	0.5496	0.1044	0.0039	794.2136	24.4529	510.527	11.9707	1703.5928	68.262	29.9677
18/25-1 3654m	Zircon_Sample_090	116.1938	36.4653	0.3349	4.7949	0.1503	0.3138	0.0073	0.7442	0.1108	0.0023	1784.0039	26.3391	1759.5336	35.9165	1812.748	38.031	97.0644
18/25-1 3654m	Zircon_Sample_091	275.4758	71.3876	2.4026	3.9065	0.1843	0.2591	0.0112	0.9134	0.1093	0.0021	1615.0222	38.1677	1485.456	57.1884	1788.2971	34.9954	83.0654
18/25-1 3654m	Zircon_Sample_092	358.1281	13.2362	0.7683	0.2813	0.019	0.037	0.0014	0.5644	0.0552	0.0031	251.6526	15.0685	233.9588	8.7655	419.993	124.602	55.7054
18/25-1 3654m	Zircon_Sample_093	695.0982	149.741	0.2685	3.2485	0.1133	0.2154	0.007	0.9292	0.1094	0.0014	1468.8293	27.0805	1257.6515	37.0212	1788.9236	23.487	70.3021
18/25-1 3654m	Zircon_Sample_094	197.9308	94.2785	0.4316	12.6817	0.3587	0.4763	0.0103	0.7615	0.1931	0.0035	2656.3043	26.6274	2511.2184	44.8014	2768.7301	30.0769	90.6993
18/25-1 3654m	Zircon_Sample_112	172.258	8.5825	0.7142	0.3605	0.0252	0.0498	0.003	0.8567	0.0525	0.0019	312.5745	18.7863	313.4373	18.2987	306.1449	82.0525	102.382
18/25-1 3654m	Zircon_Sample_113	339.8171	90.8242	0.8532	3.9723	0.1612	0.2673	0.0059	0.544	0.1078	0.0037	1628.5579	32.9267	1526.9485	30.0126	1762.4235	62.2309	86.6391
18/25-1 3654m	Zircon_Sample_114	185.1385	14.7252	1.1494	0.6225	0.0273	0.0795	0.0017	0.488	0.0568	0.0022	491.4293	17.0638	493.3526	10.1515	482.4746	84.4331	102.2546
18/25-1 3654m	Zircon_Sample_115	183.5346	92.11	1.3452	12.7198	0.582	0.5019	0.0177	0.7716	0.1838	0.0054	2659.1285	43.1008	2621.8152	76.0625	2687.6359	48.1101	97.551
18/25-1 3654m	Zircon_Sample_116	192.1486	57.4856	0.8485	4.4386	0.2251	0.2992	0.0058	0.3836	0.1076	0.005	1719.5783	42.0532	1687.2057	28.8787	1759.221	85.6454	95.9064
18/25-1 3654m	Zircon_Sample_117	4048.8201	38.9074	0.1083	0.127	0.0127	0.0096	0.0009	0.8969	0.0959	0.0042	121.4306	11.4201	61.6514	5.4912	1545.3927	82.9127	3.9894
18/25-1 3654m	Zircon_Sample_118	145.5445	6.3171	0.7485	0.3102	0.0187	0.0434	0.0012	0.4582	0.0518	0.0028	274.3077	14.5066	273.895	7.4139	277.8303	122.8184	98.5836
18/25-1 3654m	Zircon_Sample_119	332.2043	15.3307	0.568	0.3308	0.0092	0.0461	0.001	0.7648	0.052	0.0009	290.2001	7.0084	290.8312	6.0388	285.1222	40.9024	102.0023
18/25-1 3654m	Zircon_Sample_120	165.7842	7.8008	2.0357	0.3388	0.0184	0.0471	0.0015	0.5779	0.0522	0.0023	296.2813	13.988	296.4105	9.1119	295.2628	101.3996	100.3887
18/25-1 3654m	Zircon_Sample_124	317.8123	31.2037	2.1991	0.8203	0.0324	0.0982	0.0016	0.4105	0.0606	0.0022	608.2343	18.0545	603.7511	9.3334	624.9702	77.5648	96.6048
18/25-1 3654m	Zircon_Sample_125	43.1197	22.8824	1.277	13.8181	0.4685	0.5307	0.0117	0.6475	0.1889	0.0049	2737.3225	32.1157	2744.2802	49.0649	2732.1937	42.537	100.4424
18/25-1 3654m	Zircon_Sample_126	125.7167	40.1977	0.2583	4.8279	0.1666	0.3197	0.0082	0.7451	0.1095	0.0025	1789.7777	29.0299	1788.5016	40.1517	1791.2656	41.9107	99.8457
18/25-1 3654m	Zircon_Sample_127	545.8265	181.3358	0.5404	5.0663	0.1485	0.3322	0.009	0.924	0.1106	0.0012	1830.4871	24.8672	1849.1448	43.5502	1809.3308	20.3737	102.2005
18/25-1 3654m	Zircon_Sample_128	1430.2188	172.1046	2.1528	1.7509	0.1219	0.1203	0.0079	0.9368	0.1055	0.0026	1027.4916	45.0311	732.4886	45.1697	1723.5335	44.7302	42.4992
18/25-1 3654m	Zircon_Sample_129	771.8061	138.8866	0.5764	2.6947	0.0812	0.18	0.0041	0.7564	0.1086	0.0021	1327.005	22.3112	1066.702	22.3996	1776.1821	35.9535	60.0559
18/25-1 3654m	Zircon_Sample_130	198.5023	57.7459	0.9799	4.4117	0.1171	0.2909	0.0052	0.6762	0.11	0.0022	1714.53	21.9676	1646.0654	26.0673	1799.2007	35.5669	91.4887
18/25-1 3654m	Zircon_Sample_131	253.9248	11.1316	0.8446	0.3129	0.0094	0.0438	0.0008	0.6139	0.0518	0.0012	276.4433	7.284	276.5797	5.0023	275.2894	54.4257	100.4687
18/25-1 3654m	Zircon_Sample_132	323.6611	13.3213	0.6094	0.3415	0.0268	0.0412	0.0012	0.3596	0.0602	0.0044	298.2825	20.2578	260.0071	7.1822	609.7546	158.0613	42.6413
18/25-1 3654m	Zircon_Sample_133	114.0984	4.5315	0.5629	0.2831	0.0141	0.0397	0.001	0.5276	0.0517	0.0022	253.1393	11.1208	251.071	6.4482	272.346	96.6369	92.1883
18/25-1 3654m	Zircon_Sample_137	279.6732	87.6743	0.7946	4.7506	0.1657	0.3135	0.0044	0.4016	0.1099	0.0035	1776.2188	29.2586	1757.8502	21.5456	1797.8759	58.1168	97.7737
18/25-1 3654m	Zircon_Sample_138	2291.0146	145.4511	0.2975	0.9232	0.0227	0.0635	0.0008	0.4942	0.1055	0.0023	664.0516	11.9621	396.8008	4.6674	1722.4265	39.1898	23.0373
18/25-1 3654m	Zircon_Sample_139	3386.0455	178.6703	0.1766	0.6973	0.0489	0.0528	0.0036	0.9639	0.0958	0.0018	537.1696	29.2862	331.4849	21.8603	1544.6568	35.1032	21.4601
18/25-1 3654m	Zircon_Sample_140	253.197	82.8992	0.3394	4.9801	0.139	0.3274	0.008	0.8752	0.1103	0.0015	1815.9511	23.612	1825.8158	38.8516	1804.6516	24.5585	101.1728
18/25-1 3654m	Zircon_Sample_141	904.419	238.4804	0.5526	3.9036	0.1644	0.2637	0.0084	0.758	0.1074	0.003	1614.438	34.0633	1508.6604	42.9535	1755.2663	50.263	85.9505
18/25-1 3654m	Zircon_Sample_142	4180.7509	196.9975	0.1523	0.6428	0.049	0.0471	0.0029	0.8159	0.0989	0.0044	504.043	30.2888	296.8165	18.0381	1604.2409	82.1804	18.502
18/25-1 3654m	Zircon_Sample_143	944.4491	129.6191	0.52	1.9574	0.0765	0.1372	0.0044	0.8276	0.1034	0.0023	1100.9977	26.2776	829.0539	25.1681	1686.7589	40.4936	49.1507
18/25-1 3654m	Zircon_Sample_144	125.5052	5.1596	0.4699	0.2933	0.0174	0.0411	0.0014	0.5831	0.0517	0.0025	261.133	13.641	259.7161	8.7924	273.8677	110.2754	94.8327
18/25-1 3654m	Zircon_Sample_145	8594.1843	149.5515	0.1609	0.2189	0.0051	0.0174	0	0.0494	0.0912	0.0021	201.0207	4.2424	111.2123	0.1267	1451.7792	44.2134	7.6604
18/25-1 3654m	Zircon_Sample_146	255.3811	80.9459	0.5103	4.8343	0.1005	0.317	0.0048	0.7268	0.1106	0.0016	1790.8786	17.4968	1774.8709	23.4468	1809.576	25.9557	98.0821
18/25-1 3654m	Zircon_Sample_150	438.247	100.759	0.4296	3.4028	0.0862	0.2299	0.0032	0.551	0.1073	0.0023	1505.0424	19.8888	1334.0474	16.8248	1754.7778	38.6896	76.0237
18/25-1 3654m	Zircon_Sample_151	326.0123	175.6211	0.7724	14.3431	0.8829	0.5387	0.032	0.9635	0.1931	0.0032	2772.6697	58.4917	2777.9815	133.8749	2768.8061	27.0168	100.3314
18/25-1 3654m	Zircon_Sample_152	192.7807	60.7058	0.2206	4.6619	0.1797	0.3149	0.0108	0.8858	0.1074	0.0019	1760.4241	32.2304	1764.7533	52.7042	1755.2902	32.713	100.5391
18/25-1 3654m	Zircon_Sample_153	356.9819	15.0903	1.2118	0.3064	0.0142	0.0423	0.0013	0.6473	0.0526	0.0019	271.3927	11.0543	266.9003	7.8549	310.3242	80.5419	86.0069
18/25-1 3654m	Zircon_Sample_154	580.7721	75.9369	0.5709	1.8916	0.0982	0.1308	0.0058	0.8512	0.1049	0.0029	1078.1518	34.5096	792.1518	32.9521	1713.0313	50.1291	46.2427
aU and Pb concentrations and Th/U ratios are calculated relative to GJ-1 reference zircon
bCorrected for background and within-run Pb/U fractionation and normalised to reference zircon GJ-1 (ID-TIMS values/measured value); 207Pb/235U calculated using (207Pb/206Pb)/(238U/206Pb * 1/137.88)
cRho is the error correlation defined as the quotient of the propagated errors of the 206Pb/238U and the 207/235U ratio
dQuadratic addition of within-run errors (2 SD) and daily reproducibility of GJ-1 (2 SD)
eCorrected for mass-bias by normalising to GJ-1 reference zircon (~0.6 per atomic mass unit) and common Pb using the model Pb composition of Stacey & Kramers (1975)
